# Supplementary material
Source: publisher figshare collection journal article supplement (https://acs.figshare.com/ndownloader/files/7696957)
Supplement: Supplementary file 1 [file 7696957]

## RapidFire™ Mass Spectrometry with Enhanced Throughput as an Alternative to Liquid-Liquid Salt Assisted Extraction and LC/MS Analysis for Sulfonamides in Honey

Brian T. Veach, †\* Thilak K. Mudalige, † and Peter Rye§

†Office of Regulatory Affairs, Arkansas Regional Laboratory, U.S. Food and Drug Administration, 3900 NCTR Road, Jefferson, Arkansas 72079, United States

§Agilent Technologies, Life Sciences & Diagnostics Group, 121 Hartwell Avenue, Lexington, MA 02421, United States

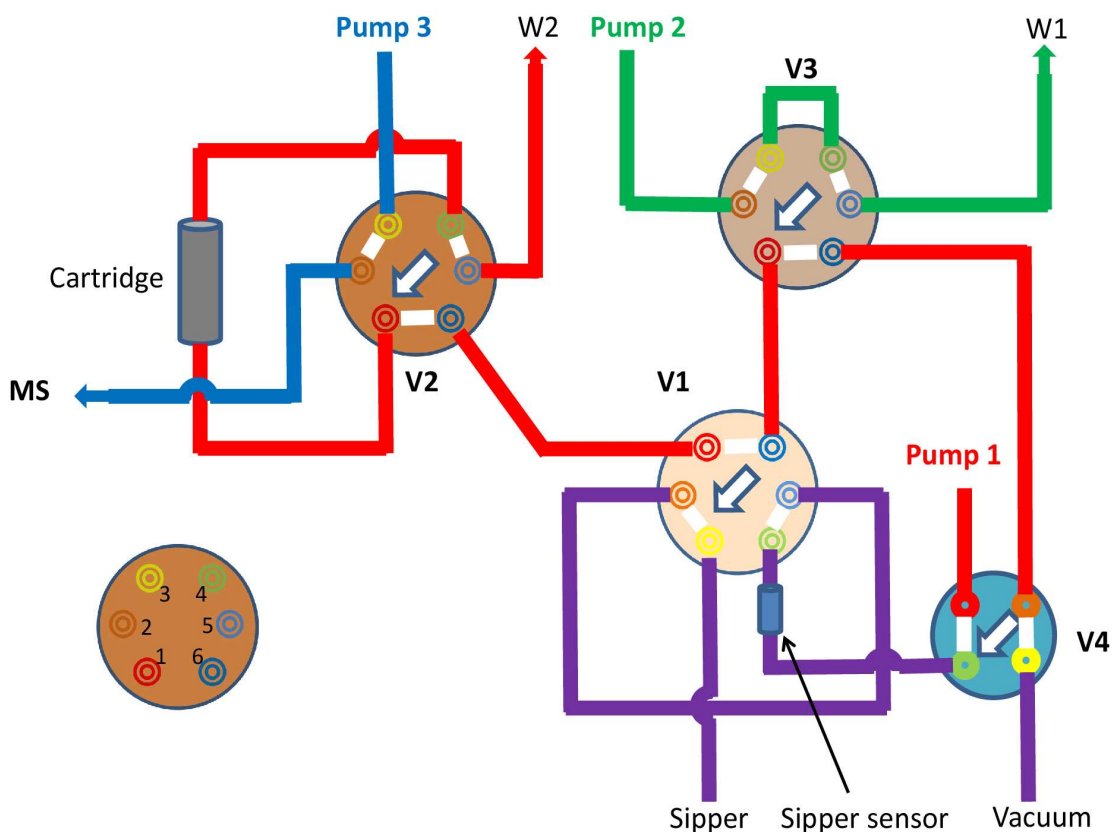

**S1.** A schematic illustration showing valve configuration and flow path in the aspiration state

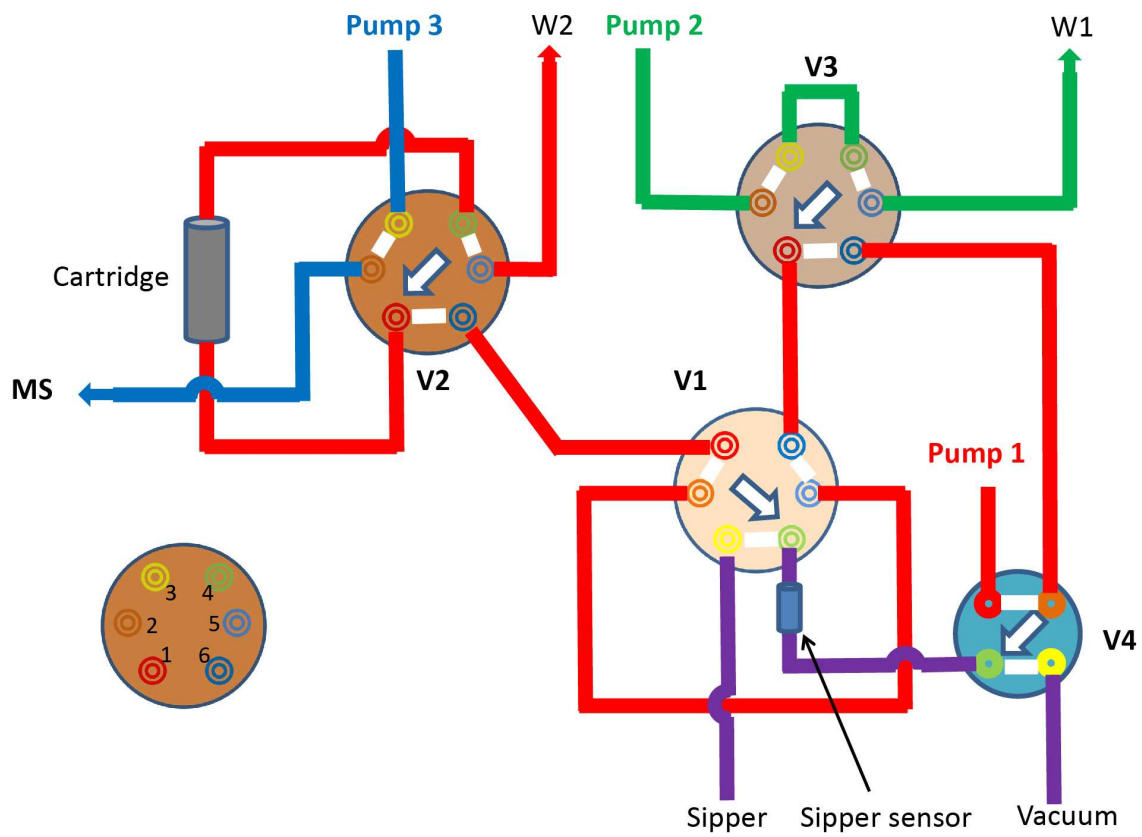

**S2.** A schematic illustration showing valve configuration and flow path in the load and wash state

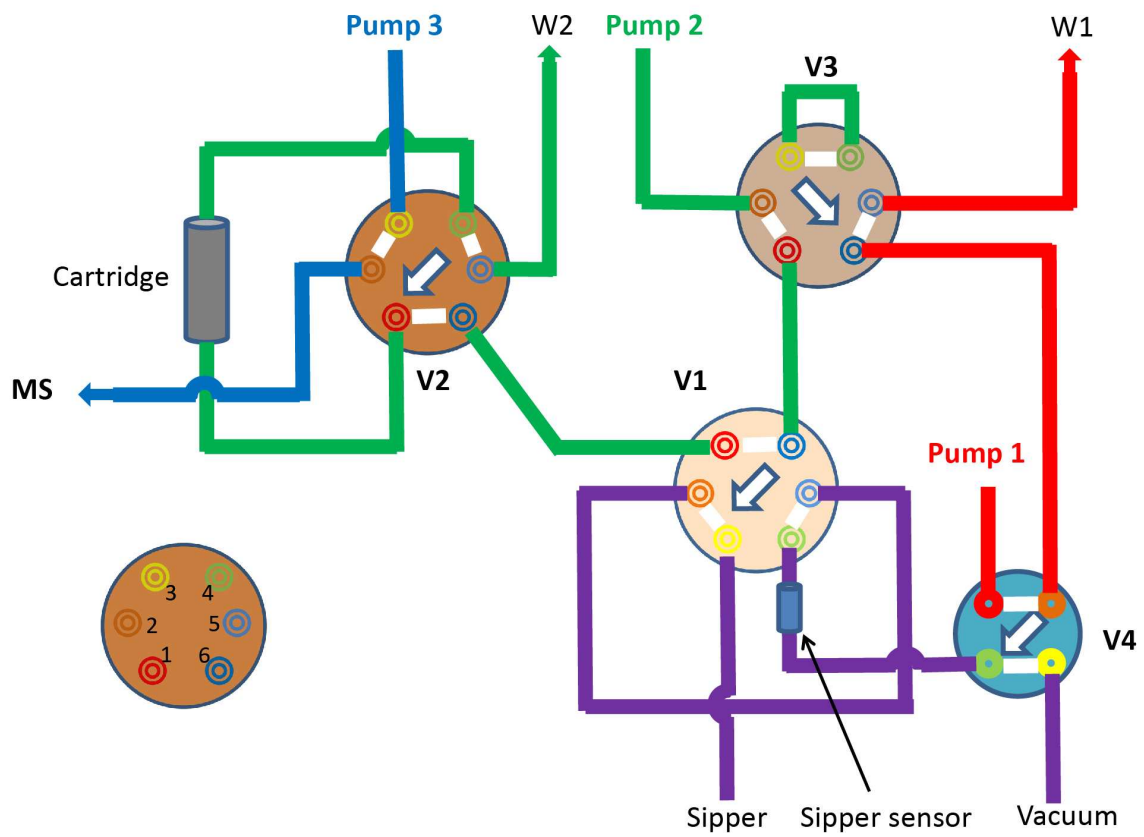

**S3.** A schematic illustration showing valve configuration and flow path in the extra wash state

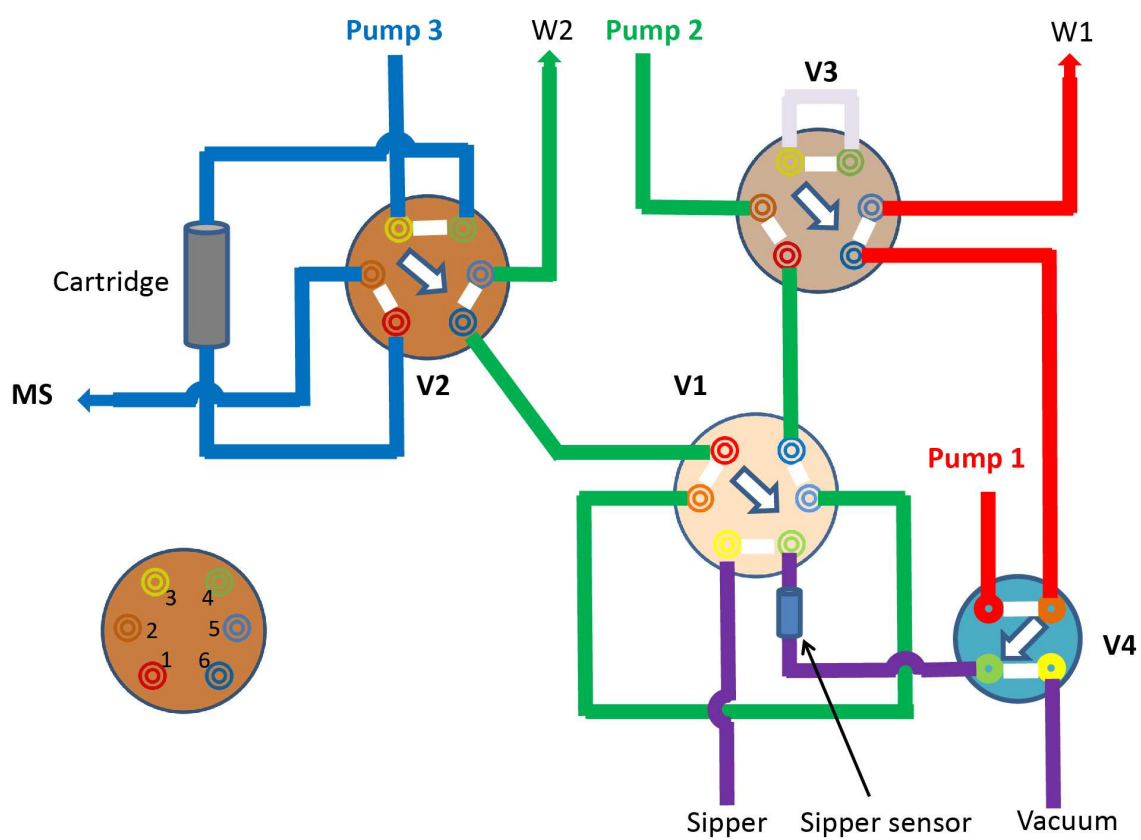

**S4.** A schematic illustration showing valve configuration and flow path in the elution state

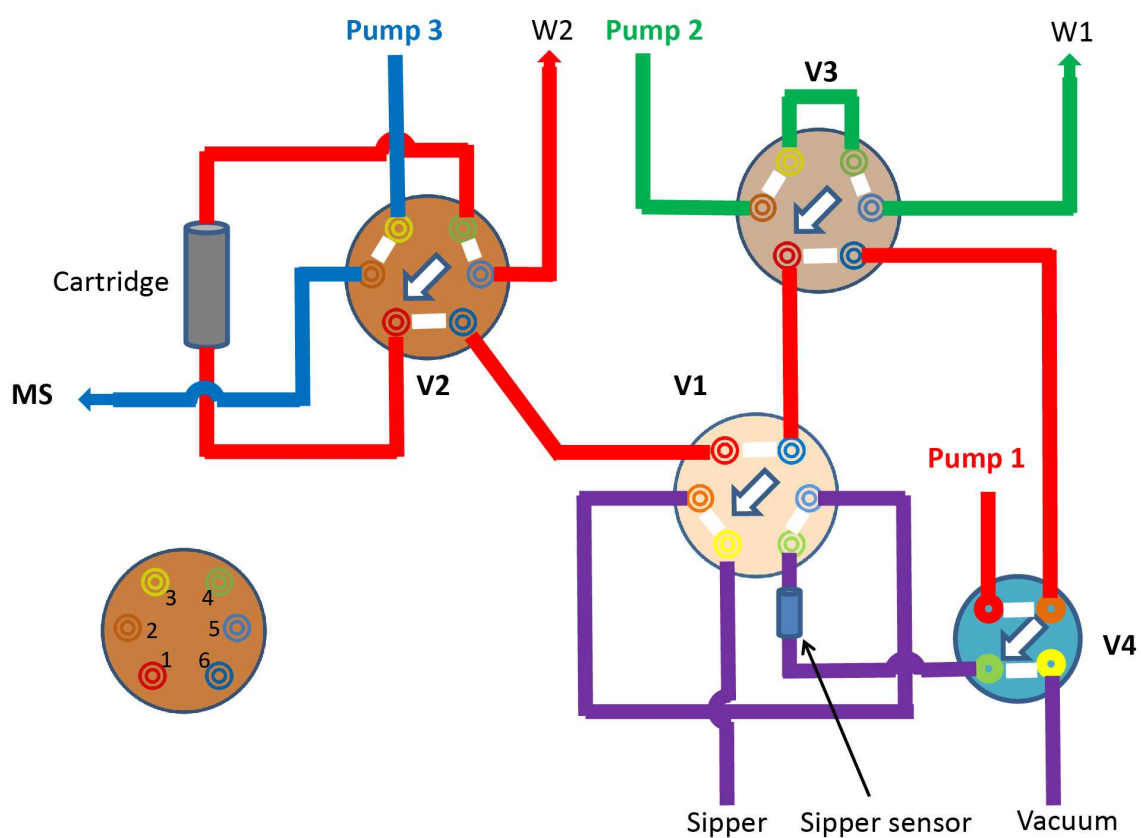

**S5.** A schematic illustration showing valve configuration and flow path in the re-equilibration state
